# Supplementary material
Source: publisher figshare collection journal article supplement (https://acs.figshare.com/ndownloader/files/4052032)
Supplement: Supplementary file 1 [file 4052032]

# SUPPORTING INFORMATION

## **Capillary Wave Confinement Induced Stabilization of Polymer Films**

Diya Bandyopadhyay, <sup>1</sup> Gurpreet Singh, <sup>1</sup> Matthew L. Becker, <sup>2</sup> Alamgir Karim, <sup>1, \*</sup>

<sup>1</sup>*Department of Polymer Engineering, The University of Akron, Akron, OH 44325*

<sup>2</sup>*Department of Polymer Science, The University of Akron, Akron, Ohio 44325, United States.*

\*Correspondence to: Alamgir Karim (330) 972-8324, [alamgir@uakron.edu](mailto:alamgir@uakron.edu)

### Supporting Information S1

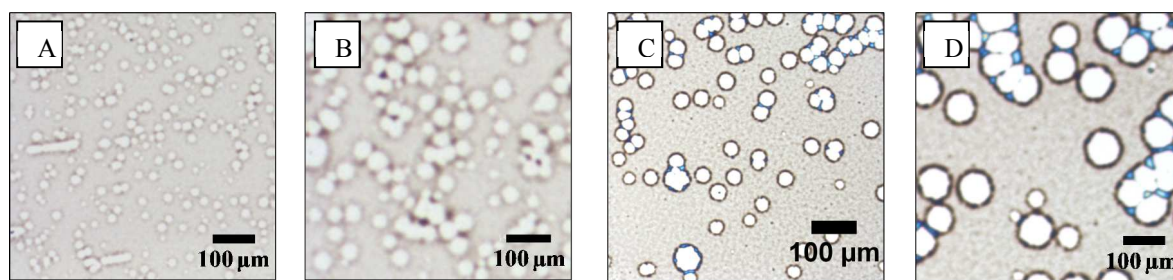

**Figure S1.** Effect of top-down flexible, unpatterned confinement on PS film stability; optical images of PS films of thickness (A) 30 nm (B) 70 nm (C) 120 nm (D) 220 nm

### Supporting Information S2

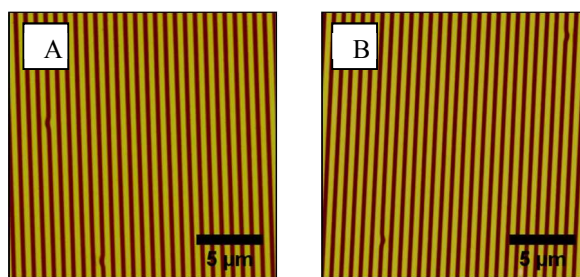

**Figure S2.** Representative AFM topography images of PS film surfaces following removal of nanopatterned confinement post-annealing (A) 70 nm PS film (B) 120 nm PS film

### Supporting Information 3

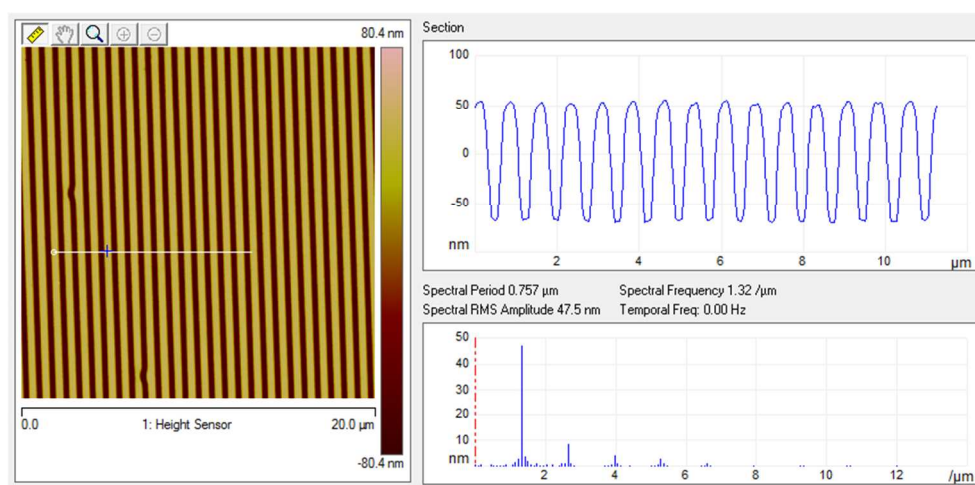

**Figure S3.** Representative AFM section profile of the topography image of a 120 nm PS film surface confined, during thermal annealing, by DVD patterned PDMS.
